# Supplementary material
Source: publisher figshare collection journal article supplement (https://asha.figshare.com/articles/dataset/_/24869592)
Supplement: Supplementary file 2 [file 2]

## Supplemental Material S2. Sample Qualitative/Functional Assessment Tools.

This is a resource list of qualitative and/or functional assessment tools that are aligned to the academic content standards and can be used for gathering student data and IEP goal and objective development. This list is not exhaustive of all available resources and/or materials.

### Sample Qualitative/Functional Assessment Tools

| Name                                                   | Link                                                                                                                                                                                                                                                                                | Description                                                                                                                                           |
|--------------------------------------------------------|-------------------------------------------------------------------------------------------------------------------------------------------------------------------------------------------------------------------------------------------------------------------------------------|-------------------------------------------------------------------------------------------------------------------------------------------------------|
| Arkansas Communication Board                           | <a href="https://www.arcommunicationboard.com/forms-materials">https://www.arcommunicationboard.com/forms-materials</a>                                                                                                                                                             | Forms from AR State Consultant for School-Based Speech-Language Pathology Services containing checklists for communication observations in classrooms |
| Bilingualistics Speech & Language Evaluation Resources | <a href="https://bilingualistics.com/">https://bilingualistics.com/</a>                                                                                                                                                                                                             | Checklists, resource lists, forms, and tools for assessment                                                                                           |
| Communication Supporting Classroom Observation Tool    | <a href="https://speechandlanguage.org.uk/talking-point/for-professionals/the-communication-trust/more-resources/classroom-supporting-tool/">https://speechandlanguage.org.uk/talking-point/for-professionals/the-communication-trust/more-resources/classroom-supporting-tool/</a> | Observation tool to describe the oral language characteristics in early education classrooms                                                          |
| CUBED Dynamic Decoding Measures (DDM)                  | <a href="https://www.languagedynamicsgroup.com/cubed-assessment-download/">https://www.languagedynamicsgroup.com/cubed-assessment-download/</a>                                                                                                                                     | Norm-referenced screening and progress monitoring tool targeting phonemic awareness, word identification, and decoding in Kindergarten – third grade  |
| CUBED Narrative Language Measures (NLM)                | <a href="https://www.languagedynamicsgroup.com/cubed-assessment-download/">https://www.languagedynamicsgroup.com/cubed-assessment-download/</a>                                                                                                                                     | Norm-referenced screening and progress monitoring tool targeting listening and reading comprehension of narratives in Kindergarten – third grade      |

|                                                                                                      |                                                                                                                                                                                                                                                                                                                                                           |                                                                                                                                      |
|------------------------------------------------------------------------------------------------------|-----------------------------------------------------------------------------------------------------------------------------------------------------------------------------------------------------------------------------------------------------------------------------------------------------------------------------------------------------------|--------------------------------------------------------------------------------------------------------------------------------------|
| Dynamic Assessment Task of Morphological Analysis (DATMA)                                            | <a href="https://pubs.asha.org/doi/full/10.1044/0161-1461(2007/021)">https://pubs.asha.org/doi/full/10.1044/0161-1461(2007/021)</a>                                                                                                                                                                                                                       | Dynamic assessment of ability to use root word and affix knowledge to define unknown words in 6th-grade children                     |
| Dynamic Assessment of Vocabulary in Context (DAVIC)                                                  | <a href="https://nbaslh.memberclicks.net/assets/Publications/2022/Dynamic%20Assessment%20of%20Contextual%20Analysis%20in%20Fourth-Grade%20Students%20-%20A%20Pilot%20Study.pdf">https://nbaslh.memberclicks.net/assets/Publications/2022/Dynamic%20Assessment%20of%20Contextual%20Analysis%20in%20Fourth-Grade%20Students%20-%20A%20Pilot%20Study.pdf</a> | Series of graduated prompts to identify effective strategies and track vocabulary learning progress                                  |
| Dynamic Measure of Oral Narrative Discourse (DYMOND)                                                 | <a href="https://pubs.asha.org/doi/10.1044/2016_JSLHR-L-15-0426">https://pubs.asha.org/doi/10.1044/2016_JSLHR-L-15-0426</a><br>Link to request materials:<br><a href="https://view.flodesk.com/pages/632b4f6ca316945cf167c498">https://view.flodesk.com/pages/632b4f6ca316945cf167c498</a>                                                                | Test-teach-test story retell protocol for Kindergarten - 3rd grade.                                                                  |
| IRIS Center Measuring Behavior Case Study Unit                                                       | <a href="http://www.iriscenter.com/wp-content/uploads/pdf_case_studies/ics_measbeh.pdf">http://www.iriscenter.com/wp-content/uploads/pdf_case_studies/ics_measbeh.pdf</a>                                                                                                                                                                                 | Instructions, forms, and case studies to train collection of different types of data (e.g., accuracy, frequency, latency, duration). |
| Clinical Focus: Assessing Functional Language in School-Aged Children Using Language Sample Analysis | <a href="https://pubs.asha.org/doi/10.1044/2020_PERSP-19-00079">https://pubs.asha.org/doi/10.1044/2020_PERSP-19-00079</a>                                                                                                                                                                                                                                 | Clinical focus article with video examples of language sample elicitation contexts aligned to CCSSs                                  |
| Predictive Early Assessment of Reading & Language (PEARL)                                            | <a href="https://www.languagedynamicsgroup.com/product/pearl-dyslexia-screener/">https://www.languagedynamicsgroup.com/product/pearl-dyslexia-screener/</a>                                                                                                                                                                                               | Reading and language screener; uses dynamic assessment to predict need for intervention in Kindergarten                              |
| Progressus Therapy Classroom Observation                                                             | <a href="http://c772064.r64.cf2.rackcdn.com/event/03800/03893/3279229-classroom-observation.pdf">http://c772064.r64.cf2.rackcdn.com/event/03800/03893/3279229-classroom-observation.pdf</a>                                                                                                                                                               | Form to document classroom and student characteristics through observation and teacher interview                                     |
| Skill-based Assessment of Core Communication Standards: K-2; Skill-                                  | <a href="https://dynamic-resources.org/collections/slp-">https://dynamic-resources.org/collections/slp-</a>                                                                                                                                                                                                                                               | Non-standardized skill probes for ELA CCSS in Kindergarten – fifth grade                                                             |

|                                                       |                                                                                                                                                                                                                                                   |                                                                                                                                                                                                       |
|-------------------------------------------------------|---------------------------------------------------------------------------------------------------------------------------------------------------------------------------------------------------------------------------------------------------|-------------------------------------------------------------------------------------------------------------------------------------------------------------------------------------------------------|
| based Assessment of Core Communication Standards: 3-5 | <a href="#">resources/products/the-saccs-bundle</a>                                                                                                                                                                                               |                                                                                                                                                                                                       |
| SLP Toolkit                                           | <a href="https://www.slptoolkit.com/">https://www.slptoolkit.com/</a>                                                                                                                                                                             | Standards-based assessments for present levels of performance, goal development, and progress monitoring                                                                                              |
| SLS Screener for Language & Literacy Disorders        | <a href="https://products.brookespublishing.com/SLS-Screener-for-Language-Literacy-Disorders-P1046.aspx">https://products.brookespublishing.com/SLS-Screener-for-Language-Literacy-Disorders-P1046.aspx</a>                                       | Questionnaire completed by parents, teachers, and students for language/literacy disorders to compare student performance on academic tasks to same-age peers ages 6-18                               |
| The Spoken Language Checklist                         | <a href="https://academic.oup.com/jdsde/article/26/2/251/6130171">https://academic.oup.com/jdsde/article/26/2/251/6130171</a>                                                                                                                     | Checklist to monitor language acquisition development; includes norms ages birth to five years                                                                                                        |
| SUGAR Language Sample Analysis                        | <a href="https://www.sugarlanguage.org/downloads">https://www.sugarlanguage.org/downloads</a>                                                                                                                                                     | A suite of tools to assist with language sample analysis including training videos, procedures, forms, resources, software system, and normative language sample analysis techniques ages 3-11 years. |
| Systematic Analysis of Language Transcripts (SALT)    | <a href="https://www.saltsoftware.com/">https://www.saltsoftware.com/</a>                                                                                                                                                                         | Online software program for language sample transcription, analysis, elicitation aids, and coding aids                                                                                                |
| Supporting Knowledge in Language and Literacy (SKILL) | <a href="https://usu-works.mybigcommerce.com/order-the-updated-skill-manual-4th-edition-with-new-online-digital-materials/">https://usu-works.mybigcommerce.com/order-the-updated-skill-manual-4th-edition-with-new-online-digital-materials/</a> | Intervention program to improve knowledge and language skills to meet CCSS speaking & listening, English language arts, and reading standards in grades K-5. Includes assessment resources.           |
| TN Speech or Language Impairment                      | <a href="https://www.tn.gov/content/dam/tn/educ">https://www.tn.gov/content/dam/tn/educ</a>                                                                                                                                                       | Speech-language impairment guidance                                                                                                                                                                   |

|                                                                                                                |                                                                                                                                                                                                                                                   |                                                                                                                                                                                                                                                                               |
|----------------------------------------------------------------------------------------------------------------|---------------------------------------------------------------------------------------------------------------------------------------------------------------------------------------------------------------------------------------------------|-------------------------------------------------------------------------------------------------------------------------------------------------------------------------------------------------------------------------------------------------------------------------------|
| Evaluation Guidance                                                                                            | <a href="#">ation/special-education/eligibility/se_speech_or_language_impairment_evaluation_guidance.pdf</a>                                                                                                                                      | document including checklists for qualitative assessment                                                                                                                                                                                                                      |
| Virginia Department of Education Speech-Language Pathology Services in Schools: Guidelines for Best Practices. | <a href="https://www.doe.virginia.gov/programs-services/special-education/specific-disabilities/speech-language-impairment">https://www.doe.virginia.gov/programs-services/special-education/specific-disabilities/speech-language-impairment</a> | SLP Best Practices Guide containing checklists and forms in Appendices. See <a href="https://www.doe.virginia.gov/home/showpublisheddocument/36199/638058575079270000">https://www.doe.virginia.gov/home/showpublisheddocument/36199/638058575079270000</a> or updated pages. |
