# Supplementary material
Source: publisher figshare collection journal article supplement (https://asha.figshare.com/articles/dataset/_/24869592)
Supplement: Supplementary file 3 [file 2]

## Supplemental Material S6. Standards-Based Instructional Resources.

This document provides resources that are aligned to grade-level standards and utilized in the academic content in classrooms. This list is not exhaustive of all available resources and/or materials.

### Standards-Based Instructional Resources

| Name                                                                                                       | Link                                                                                                                                                                                            | Description                                                                                                                                  |
|------------------------------------------------------------------------------------------------------------|-------------------------------------------------------------------------------------------------------------------------------------------------------------------------------------------------|----------------------------------------------------------------------------------------------------------------------------------------------|
| Achieve the Core                                                                                           | <a href="https://achievethecore.org/">https://achievethecore.org/</a>                                                                                                                           | Standards-aligned digital tools and resources for ELA/Literacy & Math                                                                        |
| COMMONLIT                                                                                                  | <a href="https://www.commonlit.org/en">https://www.commonlit.org/en</a>                                                                                                                         | English Language Arts curriculum for grades 3-12 searchable by grade level, topic, CCSS                                                      |
| Epic!                                                                                                      | <a href="https://www.getepic.com/sign-in">https://www.getepic.com/sign-in</a>                                                                                                                   | Digital library with audiobooks and domain-specific content, including social-emotional learning                                             |
| Florida Center for Reading Research                                                                        | <a href="https://fcrr.org/student-center-activities">https://fcrr.org/student-center-activities</a>                                                                                             | Standards-aligned reading activities for all 5 areas of reading; professional development for teachers and leaders; information for families |
| The Grammar Project                                                                                        | <a href="https://thesyntaxproject2022.squarespace.com/">https://thesyntaxproject2022.squarespace.com/</a>                                                                                       | Syntax, punctuation and morphology lessons from Australia                                                                                    |
| Grammatical Concepts of English: Suggested Order of Intervention by Ebbels, S. & Owen Van Horne, A. (2020) | <a href="https://www.theinformedslp.com/review/the-grammar-guide-you-never-knew-you-always-wanted">https://www.theinformedslp.com/review/the-grammar-guide-you-never-knew-you-always-wanted</a> | Spreadsheet outlining order of development of syntax targets                                                                                 |

|                                                                         |                                                                                                                                                                                                                                                               |                                                                                                                                      |
|-------------------------------------------------------------------------|---------------------------------------------------------------------------------------------------------------------------------------------------------------------------------------------------------------------------------------------------------------|--------------------------------------------------------------------------------------------------------------------------------------|
| IXL Learning                                                            | <a href="https://www.ixl.com/">https://www.ixl.com/</a>                                                                                                                                                                                                       | Standards-aligned digital curriculum for PreK-12th grades                                                                            |
| K12 Reader                                                              | <a href="https://www.k12reader.com/">https://www.k12reader.com/</a>                                                                                                                                                                                           | Reading passages and activities aligned with CCSS                                                                                    |
| LD@school Supporting Oral Language in the Classroom: Educator Toolkit   | <a href="https://www.ldatschool.ca/wp-content/uploads/2022/08/LDAO-Oral-Language-Toolkit_FINALFINAL.pdf#page=[5]">https://www.ldatschool.ca/wp-content/uploads/2022/08/LDAO-Oral-Language-Toolkit_FINALFINAL.pdf#page=[5]</a>                                 | Resource for teachers to support oral language in the classroom                                                                      |
| New York Times Learning Network                                         | <a href="https://www.nytimes.com/section/learning">https://www.nytimes.com/section/learning</a>                                                                                                                                                               | Teaching resources using the New York Times content                                                                                  |
| Literacy-Based Speech and Language Therapy Activities                   | <a href="https://bilinguistics.com/catalog/digital-e-books/literacy-based-speech-and-language-therapy-activities-digital-e-book/">https://bilinguistics.com/catalog/digital-e-books/literacy-based-speech-and-language-therapy-activities-digital-e-book/</a> | English & Spanish literacy-based speech and language therapy plans, activities, and materials with links to curriculum and standards |
| Academic Vocabulary in the ELAR and Mathematics TEKS: K-1, 3-5 & 6-8    | <a href="https://meadowscenter.org/resource/academic-vocabulary-in-the-elar-and-mathematics-teks-a-teacher-resource/">https://meadowscenter.org/resource/academic-vocabulary-in-the-elar-and-mathematics-teks-a-teacher-resource/</a>                         | Instructional materials to improve academic vocabulary needed for standardized assessment in TX                                      |
| NewsELA                                                                 | <a href="https://newsela.com/">https://newsela.com/</a>                                                                                                                                                                                                       | Standards-aligned articles and reading passages for literature and informational texts                                               |
| Language and Reading Research Consortium Curriculum (English & Spanish) | <a href="https://larrc.ehe.osu.edu/">https://larrc.ehe.osu.edu/</a>                                                                                                                                                                                           | PreK-grade 3 language skills curriculum                                                                                              |
| Reading Rockets                                                         | <a href="https://www.readingrockets.org/">https://www.readingrockets.org/</a>                                                                                                                                                                                 | Public media literacy initiative offering resources for the public, parents, teachers, and leaders                                   |
| Reading Universe                                                        | <a href="https://www.readinguniverse.org/">https://www.readinguniverse.org/</a>                                                                                                                                                                               | Student activities and resources for teachers, leaders, and parents following the                                                    |

|                                                        |                                                                                                                                                                                                                                                   |                                                                                                                                                              |
|--------------------------------------------------------|---------------------------------------------------------------------------------------------------------------------------------------------------------------------------------------------------------------------------------------------------|--------------------------------------------------------------------------------------------------------------------------------------------------------------|
|                                                        |                                                                                                                                                                                                                                                   | Simple View of Reading                                                                                                                                       |
| ReadWorks                                              | <a href="https://www.readworks.org/">https://www.readworks.org/</a>                                                                                                                                                                               | Standards-aligned articles and reading passages for literature and informational texts                                                                       |
| ReadWriteThink                                         | <a href="https://www.readwritethink.org/">https://www.readwritethink.org/</a>                                                                                                                                                                     | Educator resources including standards-aligned lesson plans, videos, activities, and apps                                                                    |
| SERP Institute Educator Resources                      | <a href="https://www.serp institute.org/">https://www.serp institute.org/</a>                                                                                                                                                                     | Educator resources including CCSS-aligned instructional materials for literacy, math, science, and history                                                   |
| Story Champs                                           | <a href="https://www.languagedynamicsgroup.com/story-champs/">https://www.languagedynamicsgroup.com/story-champs/</a>                                                                                                                             | Oral language intervention curriculum designed to promote academic language competence through explicit teaching.                                            |
| Supporting Knowledge in Language and Literacy (SKILL)  | <a href="https://usu-works.mybigcommerce.com/order-the-updated-skill-manual-4th-edition-with-new-online-digital-materials/">https://usu-works.mybigcommerce.com/order-the-updated-skill-manual-4th-edition-with-new-online-digital-materials/</a> | Intervention program to improve knowledge and language skills to meet CCSS speaking & listening, English language arts, and reading standards in grades K-5. |
| University of Florida Literacy Institute               | <a href="https://ufli.education.ufl.edu/">https://ufli.education.ufl.edu/</a>                                                                                                                                                                     | Literacy Lessons, passages, student activities; professional development and resources for teachers and leaders; information for families                    |
| Wonderopolis                                           | <a href="https://wonderopolis.org/">https://wonderopolis.org/</a>                                                                                                                                                                                 | Q&A articles and videos across a variety of topics                                                                                                           |
| Word Connections: A Multisyllabic Word Reading Program | <a href="https://www.jessicatoste.com/wordconnections">https://www.jessicatoste.com/wordconnections</a>                                                                                                                                           | Word reading curriculum for grades 3 and above                                                                                                               |
